# Supplementary material for: Phenylpropanoid Content of Chickpea Seed Coats in Relation to Seed Dormancy
Source: MDPI journal article supplement (doi:10.3390/plants12142687), 2023-07-19
Supplement: s1 [file s1]

Supplementary table 3A – Average values of flavonoids (pmol/mg DW) detected in the seed coats of non-dormant RILs.

| Class     | Compound     | CRIL2-5  |       | CRIL2-6  |       | CRIL2-7  |       | CRIL2-15 |       |
|-----------|--------------|----------|-------|----------|-------|----------|-------|----------|-------|
|           |              | Mean     | SD    | Mean     | SD    | Mean     | SD    | Mean     | SD    |
| Flavanol  | Galocatechin | 9.284    | 0.154 | 17.630   | 1.918 | 11.878   | 1.964 | 19.461   | 2.354 |
|           | Catechin     | –        | –     | –        | –     | 0.587    | 0.067 | –        | –     |
| Flavonol  | Myricetin    | 8.468    | 1.037 | 12.550   | 0.594 | 6.546    | 1.709 | 20.010   | 1.134 |
|           | Quercetin    | 0.163    | 0.014 | 0.089    | 0.014 | 0.637    | 0.049 | 0.193    | 0.017 |
|           | Kaempferol   | 0.050    | 0.014 | 0.027    | 0.008 | 0.466    | 0.044 | 0.036    | 0.006 |
|           | Morin        | 3.329    | 0.647 | 2.664    | 0.297 | 8.807    | 2.385 | 4.837    | 0.436 |
|           | Myricitrin   | 1.266    | 0.213 | 1.338    | 0.170 | 0.894    | 0.091 | 2.202    | 0.203 |
|           | Quercitrin   | 1.532    | 0.085 | 0.658    | 0.063 | 2.447    | 0.327 | 1.951    | 0.287 |
| Flavone   | Luteolin     | 0.810    | 0.181 | 0.446    | 0.027 | 1.925    | 0.117 | 0.912    | 0.115 |
|           | Isoorientin  | 0.015    | 0.003 | 0.023    | 0.003 | 0.034    | 0.006 | 0.009    | 0.001 |
|           | Orientin     | 0.029    | 0.003 | 0.047    | 0.009 | 0.060    | 0.017 | 0.020    | 0.002 |
|           | Isovitexin   | 0.041    | 0.011 | 0.005    | 0.001 | 0.001    | 0.000 | 0.008    | 0.001 |
| Flavonone | Naringenin   | 4.220    | 0.335 | 8.754    | 1.078 | 5.347    | 0.950 | 4.252    | 0.947 |
|           |              | CRIL2-23 |       | CRIL2-43 |       | CRIL2-45 |       | CRIL2-47 |       |
|           |              | Mean     | SD    | Mean     | SD    | Mean     | SD    | Mean     | SD    |
| Flavanol  | Galocatechin | 10.860   | 0.991 | 12.223   | 0.861 | 12.528   | 2.808 | 6.619    | 1.098 |
|           | Catechin     | 0.826    | 0.081 | 0.688    | 0.072 | –        | –     | 0.917    | 0.121 |
| Flavonol  | Myricetin    | 6.626    | 0.781 | 9.674    | 2.276 | 9.437    | 1.932 | 4.879    | 0.630 |
|           | Quercetin    | 0.773    | 0.068 | 0.977    | 0.255 | 0.047    | 0.008 | 0.598    | 0.039 |
|           | Kaempferol   | 0.467    | 0.056 | 0.584    | 0.080 | 0.024    | 0.003 | 0.635    | 0.141 |
|           | Morin        | 13.068   | 0.716 | 15.149   | 2.875 | 0.584    | 0.173 | 12.072   | 1.157 |
|           | Myricitrin   | 0.832    | 0.030 | 1.469    | 0.195 | 2.541    | 0.390 | 0.621    | 0.106 |
|           | Quercitrin   | 3.800    | 0.087 | 4.499    | 0.769 | 2.506    | 0.383 | 2.597    | 0.436 |
| Flavone   | Luteolin     | 3.275    | 0.274 | 3.128    | 0.645 | 0.603    | 0.071 | 1.371    | 0.164 |
|           | Isoorientin  | 0.020    | 0.001 | 0.007    | 0.002 | 0.010    | 0.001 | 0.009    | 0.003 |
|           | Orientin     | 0.043    | 0.010 | 0.022    | 0.003 | 0.031    | 0.007 | 0.031    | 0.007 |
|           | Isovitexin   | 0.003    | 0.002 | 0.001    | 0.000 | 0.005    | 0.001 | 0.002    | 0.001 |
| Flavonone | Naringenin   | 8.826    | 0.571 | 7.797    | 1.869 | 3.017    | 0.683 | 4.873    | 0.797 |

Supplementary table 3B – Average values of flavonoids (pmol/mg DW) detected in the seed coats of non-dormant RILs..

| Class     | Compound      | CRIL2-50 |       | CRIL2-51 |       | CRIL2-65  |       | CRIL2-80  |       |
|-----------|---------------|----------|-------|----------|-------|-----------|-------|-----------|-------|
|           |               | Mean     | SD    | Mean     | SD    | Mean      | SD    | Mean      | SD    |
| Flavanol  | Gallocatechin | 7.278    | 1.913 | 11.693   | 0.480 | 6.366     | 0.241 | 7.775     | 1.917 |
|           | Catechin      | 0.421    | 0.147 | 0.606    | 0.157 | –         | –     | –         | –     |
| Flavonol  | Myricetin     | 2.542    | 0.481 | 11.964   | 1.703 | 8.135     | 1.746 | 10.071    | 1.704 |
|           | Quercetin     | 0.174    | 0.044 | 0.570    | 0.079 | 0.029     | 0.002 | 0.042     | 0.010 |
|           | Kaempferol    | 0.033    | 0.008 | 0.298    | 0.030 | 0.014     | 0.002 | 0.020     | 0.002 |
|           | Morin         | 4.648    | 0.999 | 11.589   | 1.102 | 0.213     | 0.040 | 0.109     | 0.008 |
|           | Myricitrin    | 0.827    | 0.263 | 1.379    | 0.163 | 1.669     | 0.404 | 1.715     | 0.200 |
|           | Quercitrin    | 3.174    | 0.670 | 4.510    | 0.439 | 0.632     | 0.129 | 1.477     | 0.358 |
| Flavone   | Luteolin      | 1.727    | 0.159 | 2.031    | 0.244 | 0.176     | 0.009 | 0.209     | 0.029 |
|           | Isoorientin   | 0.015    | 0.003 | 0.006    | 0.001 | –         | –     | 0.010     | 0.002 |
|           | Orientin      | 0.028    | 0.006 | –        | –     | 0.026     | 0.005 | 0.040     | 0.007 |
|           | Isovitexin    | 0.002    | 0.001 | 0.005    | 0.000 | 0.004     | 0.001 | 0.003     | 0.000 |
| Flavonone | Naringenin    | 2.676    | 0.633 | 5.295    | 0.970 | 3.194     | 0.709 | 2.678     | 0.354 |
|           |               | CRIL2-81 |       | CRIL2-89 |       | CRIL2-110 |       | CRIL2-111 |       |
|           |               | Mean     | SD    | Mean     | SD    | Mean      | SD    | Mean      | SD    |
| Flavanol  | Gallocatechin | 7.238    | 0.735 | 5.916    | 0.417 | 5.720     | 0.576 | 8.221     | 0.220 |
|           | Catechin      | –        | –     | 0.844    | 0.048 | 0.894     | 0.089 | 0.866     | 0.142 |
| Flavonol  | Myricetin     | 5.956    | 0.936 | 6.094    | 0.503 | 3.890     | 0.390 | 6.269     | 1.007 |
|           | Quercetin     | 0.016    | 0.002 | 0.259    | 0.024 | 0.143     | 0.031 | 0.419     | 0.053 |
|           | Kaempferol    | 0.006    | 0.001 | 0.475    | 0.053 | 0.321     | 0.048 | 0.514     | 0.156 |
|           | Morin         | 0.957    | 0.110 | 7.310    | 0.473 | 4.318     | 0.555 | 9.629     | 1.595 |
|           | Myricitrin    | 1.335    | 0.376 | 1.072    | 0.179 | 0.904     | 0.254 | 0.581     | 0.021 |
|           | Quercitrin    | 1.302    | 0.280 | 3.033    | 0.195 | 2.175     | 0.606 | 2.359     | 0.547 |
| Flavone   | Luteolin      | 0.126    | 0.034 | 0.781    | 0.089 | 0.477     | 0.109 | 1.519     | 0.063 |
|           | Isoorientin   | 0.003    | 0.000 | 0.008    | 0.002 | 0.004     | 0.001 | 0.056     | 0.011 |
|           | Orientin      | 0.018    | 0.003 | –        | –     | 0.017     | 0.002 | 0.096     | 0.015 |
|           | Isovitexin    | 0.002    | 0.000 | 0.012    | 0.002 | 0.002     | 0.001 | 0.011     | 0.001 |
| Flavonone | Naringenin    | 2.042    | 0.185 | 6.564    | 0.551 | 3.150     | 0.516 | 7.532     | 1.311 |
