# Supplementary material for: Phenylpropanoid Content of Chickpea Seed Coats in Relation to Seed Dormancy
Source: MDPI journal article supplement (doi:10.3390/plants12142687), 2023-07-19
Supplement: s1 [file s1]

Supplementary table 2A – Average values of phenolic compounds (pmol/mg DW) detected in the seed coats of dormant RILs and intermediate CRIL2-25.

| Class                            | Compound                                 | CRIL2-14 |       | CRIL2-21 |       | CRIL2-27 |       | CRIL2-42  |       |
|----------------------------------|------------------------------------------|----------|-------|----------|-------|----------|-------|-----------|-------|
|                                  |                                          | Mean     | SD    | Mean     | SD    | Mean     | SD    | Mean      | SD    |
| Hydroxybenzoate                  | Gallic acid                              | –        | –     | –        | –     | 3.837    | 0.457 | –         | –     |
|                                  | Salicylic acid-2-O- $\beta$ -D-glucoside | 4.275    | 0.326 | 1.606    | 0.186 | 2.448    | 0.071 | 2.750     | 0.110 |
|                                  | 4-Hydroxybenzoic acid                    | 4.518    | 0.407 | 6.772    | 0.478 | 4.828    | 0.304 | 5.622     | 0.231 |
|                                  | Vanillic acid                            | 0.389    | 0.011 | 1.904    | 0.098 | –        | –     | 0.907     | 0.056 |
|                                  | 3-Hydroxybenzoic acid                    | 0.134    | 0.032 | 0.185    | 0.007 | 0.077    | 0.006 | 0.148     | 0.020 |
|                                  | Syringic acid                            | 0.028    | 0.003 | 0.027    | 0.004 | 0.048    | 0.004 | 0.024     | 0.001 |
|                                  | Salicylic acid                           | 1.304    | 0.116 | 0.396    | 0.064 | 0.987    | 0.145 | 0.765     | 0.101 |
| Hydroxycinnamate                 | Chlorogenic acid                         | 0.374    | 0.012 | 0.238    | 0.018 | 0.103    | 0.015 | 0.324     | 0.049 |
|                                  | Caffeic acid                             | 0.016    | 0.004 | 0.012    | 0.002 | 0.019    | 0.003 | 0.037     | 0.005 |
|                                  | <i>p</i> -Coumaric acid                  | 0.140    | 0.011 | 0.157    | 0.023 | 0.210    | 0.015 | 0.204     | 0.005 |
|                                  | Ferulic acid                             | 0.415    | 0.034 | 1.949    | 0.529 | 0.329    | 0.088 | 1.991     | 0.164 |
|                                  | Sinapic acid                             | 0.140    | 0.010 | 0.370    | 0.049 | 0.176    | 0.004 | 0.269     | 0.020 |
| Hydroxycinnamic acid derivatives | Coniferaldehyde                          | 0.044    | 0.003 | 0.014    | 0.002 | 0.049    | 0.016 | 0.074     | 0.017 |
|                                  |                                          | CRIL2-48 |       | CRIL2-60 |       | CRIL2-79 |       | CRIL2-106 |       |
|                                  |                                          | Mean     | SD    | Mean     | SD    | Mean     | SD    | Mean      | SD    |
| Hydroxybenzoate                  | Gallic acid                              | 1.336    | 0.231 | –        | –     | –        | –     | 0.297     | 0.015 |
|                                  | Salicylic acid-2-O- $\beta$ -D-glucoside | 3.641    | 0.456 | 4.936    | 0.391 | 2.639    | 0.181 | 5.787     | 0.489 |
|                                  | 4-Hydroxybenzoic acid                    | 4.984    | 0.555 | 12.974   | 0.798 | 7.461    | 0.527 | 12.640    | 1.319 |
|                                  | Vanillic acid                            | 0.500    | 0.039 | 1.236    | 0.125 | 0.636    | 0.036 | 1.302     | 0.141 |
|                                  | 3-Hydroxybenzoic acid                    | 0.069    | 0.012 | 0.115    | 0.023 | 0.100    | 0.008 | 0.153     | 0.047 |
|                                  | Syringic acid                            | 0.016    | 0.002 | 0.018    | 0.000 | 0.023    | 0.002 | 0.021     | 0.001 |
|                                  | Salicylic acid                           | 1.489    | 0.143 | 0.927    | 0.105 | 0.989    | 0.237 | 1.284     | 0.242 |
| Hydroxycinnamate                 | Chlorogenic acid                         | 0.307    | 0.065 | 0.648    | 0.140 | 0.357    | 0.060 | 0.806     | 0.168 |
|                                  | Caffeic acid                             | 0.050    | 0.015 | 0.095    | 0.011 | 0.022    | 0.001 | 0.088     | 0.008 |
|                                  | <i>p</i> -Coumaric acid                  | 0.290    | 0.093 | 0.446    | 0.029 | 0.253    | 0.028 | 0.372     | 0.054 |
|                                  | Ferulic acid                             | 0.665    | 0.138 | 1.208    | 0.087 | 0.457    | 0.054 | 0.981     | 0.128 |
|                                  | Sinapic acid                             | 0.064    | 0.011 | 0.120    | 0.014 | 0.215    | 0.019 | 0.097     | 0.009 |
| Hydroxycinnamic acid derivatives | Coniferaldehyde                          | 0.095    | 0.014 | 0.073    | 0.003 | 0.020    | 0.004 | 0.051     | 0.010 |

Supplementary table 2B – Average values of phenolic compounds (pmol/mg DW) detected in the seed coats of dormant RILs and intermediate CRIL2-25.

| Class                            | Compound                                 | CRIL2-114 |       | CRIL2-115 |       | CRIL2-129 |       | CRIL2-131 |       |
|----------------------------------|------------------------------------------|-----------|-------|-----------|-------|-----------|-------|-----------|-------|
|                                  |                                          | Mean      | SD    | Mean      | SD    | Mean      | SD    | Mean      | SD    |
| Hydroxybenzoate                  | Gallic acid                              | 2.100     | 0.314 | –         | –     | –         | –     | –         | –     |
|                                  | Salicylic acid-2-O- $\beta$ -D-glucoside | 5.056     | 0.459 | 1.961     | 0.292 | 3.845     | 0.350 | 4.802     | 0.080 |
|                                  | 4-Hydroxybenzoic acid                    | 8.243     | 0.984 | 6.008     | 1.401 | 12.657    | 1.219 | 12.760    | 0.105 |
|                                  | Vanillic acid                            | –         | –     | 0.407     | 0.139 | 0.737     | 0.087 | 1.459     | 0.082 |
|                                  | 3-Hydroxybenzoic acid                    | 0.179     | 0.040 | 0.208     | 0.040 | 0.173     | 0.031 | 0.214     | 0.032 |
|                                  | Syringic acid                            | 0.035     | 0.009 | 0.015     | 0.001 | 0.022     | 0.001 | 0.030     | 0.007 |
|                                  | Salicylic acid                           | 2.291     | 0.231 | 0.673     | 0.104 | 1.087     | 0.123 | 1.549     | 0.038 |
| Hydroxycinnamate                 | Chlorogenic acid                         | 0.588     | 0.061 | 0.384     | 0.057 | 0.500     | 0.112 | 0.390     | 0.138 |
|                                  | Caffeic acid                             | 0.029     | 0.008 | 0.028     | 0.001 | 0.079     | 0.018 | 0.035     | 0.005 |
|                                  | <i>p</i> -Coumaric acid                  | 0.248     | 0.053 | 0.207     | 0.030 | 0.380     | 0.050 | 0.294     | 0.006 |
|                                  | Ferulic acid                             | 0.303     | 0.037 | 0.834     | 0.144 | 1.335     | 0.149 | 1.016     | 0.011 |
|                                  | Sinapic acid                             | 0.053     | 0.012 | 0.092     | 0.029 | 0.193     | 0.022 | 0.151     | 0.001 |
| Hydroxycinnamic acid derivatives | Coniferaldehyde                          | 0.064     | 0.007 | 0.015     | 0.005 | 0.063     | 0.007 | 0.059     | 0.001 |

  

|                                  |                                          | CRIL2-25 |       |
|----------------------------------|------------------------------------------|----------|-------|
|                                  |                                          | Mean     | SD    |
| Hydroxybenzoate                  | Gallic acid                              | 7.581    | 0.562 |
|                                  | Salicylic acid-2-O- $\beta$ -D-glucoside | 4.547    | 0.600 |
|                                  | 4-Hydroxybenzoic acid                    | 5.288    | 0.502 |
|                                  | Vanillic acid                            | –        | –     |
|                                  | 3-Hydroxybenzoic acid                    | 0.101    | 0.014 |
|                                  | Syringic acid                            | 0.051    | 0.006 |
|                                  | Salicylic acid                           | 2.147    | 0.345 |
| Hydroxycinnamate                 | Chlorogenic acid                         | 0.490    | 0.111 |
|                                  | Caffeic acid                             | 0.013    | 0.001 |
|                                  | <i>p</i> -Coumaric acid                  | 0.176    | 0.022 |
|                                  | Ferulic acid                             | 0.358    | 0.040 |
|                                  | Sinapic acid                             | 0.117    | 0.012 |
| Hydroxycinnamic acid derivatives | Coniferaldehyde                          | 0.072    | 0.008 |
