# Supplementary material for: Phenylpropanoid Content of Chickpea Seed Coats in Relation to Seed Dormancy
Source: MDPI journal article supplement (doi:10.3390/plants12142687), 2023-07-19
Supplement: s1 [file s1]

Supplementary table 1A – Average values of phenolic compounds (pmol/mg DW) detected in the seed coats of non-dormant RILs.

| Class                            | Compound                                 | CRIL2-5  |       | CRIL2-6  |       | CRIL2-7  |       | CRIL2-15 |       |
|----------------------------------|------------------------------------------|----------|-------|----------|-------|----------|-------|----------|-------|
|                                  |                                          | Mean     | SD    | Mean     | SD    | Mean     | SD    | Mean     | SD    |
| Hydroxybenzoate                  | Gallic acid                              | 14.240   | 0.968 | 10.705   | 1.199 | 1.278    | 0.406 | 2.353    | 0.411 |
|                                  | Salicylic acid-2-O- $\beta$ -D-glucoside | 0.110    | 0.015 | 0.208    | 0.026 | 2.728    | 0.382 | 3.005    | 0.266 |
|                                  | 4-Hydroxybenzoic acid                    | 3.263    | 0.321 | 2.163    | 0.277 | 11.239   | 1.762 | 6.996    | 0.656 |
|                                  | Vanillic acid                            | –        | –     | –        | –     | 0.661    | 0.101 | –        | –     |
|                                  | 3-Hydroxybenzoic acid                    | 0.064    | 0.012 | 0.032    | 0.005 | 0.136    | 0.013 | 0.059    | 0.006 |
|                                  | Syringic acid                            | 0.049    | 0.008 | 0.055    | 0.003 | 0.022    | 0.005 | 0.020    | 0.004 |
|                                  | Salicylic acid                           | 0.244    | 0.051 | 0.286    | 0.031 | 1.670    | 0.220 | 0.875    | 0.122 |
| Hydroxycinnamate                 | Chlorogenic acid                         | 0.204    | 0.035 | 0.198    | 0.048 | 0.144    | 0.019 | 0.351    | 0.036 |
|                                  | Caffeic acid                             | 0.022    | 0.001 | 0.036    | 0.003 | 0.033    | 0.002 | 0.055    | 0.011 |
|                                  | <i>p</i> -Coumaric acid                  | 0.214    | 0.004 | 0.427    | 0.060 | 0.274    | 0.026 | 0.296    | 0.025 |
|                                  | Ferulic acid                             | 0.657    | 0.060 | 0.965    | 0.176 | 0.443    | 0.017 | 0.460    | 0.045 |
|                                  | Sinapic acid                             | 0.113    | 0.014 | 0.309    | 0.046 | 0.206    | 0.012 | 0.097    | 0.004 |
| Hydroxycinnamic acid derivatives | Coniferaldehyde                          | 0.063    | 0.005 | 0.069    | 0.005 | 0.028    | 0.003 | 0.050    | 0.008 |
|                                  |                                          | CRIL2-23 |       | CRIL2-43 |       | CRIL2-45 |       | CRIL2-47 |       |
|                                  |                                          | Mean     | SD    | Mean     | SD    | Mean     | SD    | Mean     | SD    |
| Hydroxybenzoate                  | Gallic acid                              | 2.223    | 0.193 | 5.415    | 0.445 | 0.673    | 0.032 | 2.054    | 0.099 |
|                                  | Salicylic acid-2-O- $\beta$ -D-glucoside | 4.522    | 0.226 | 2.882    | 0.557 | 6.013    | 0.670 | 1.797    | 0.199 |
|                                  | 4-Hydroxybenzoic acid                    | 7.497    | 0.833 | 10.130   | 0.707 | 8.797    | 1.295 | 7.617    | 1.384 |
|                                  | Vanillic acid                            | 0.534    | 0.123 | 1.225    | 0.107 | 0.552    | 0.048 | 0.487    | 0.133 |
|                                  | 3-Hydroxybenzoic acid                    | 0.145    | 0.016 | 0.119    | 0.019 | 0.073    | 0.023 | 0.082    | 0.021 |
|                                  | Syringic acid                            | 0.050    | 0.013 | 0.051    | 0.002 | 0.022    | 0.003 | 0.041    | 0.005 |
|                                  | Salicylic acid                           | 2.077    | 0.173 | 2.799    | 0.280 | 1.786    | 0.344 | 0.651    | 0.229 |
| Hydroxycinnamate                 | Chlorogenic acid                         | 0.170    | 0.017 | 0.433    | 0.096 | 0.276    | 0.059 | 0.144    | 0.029 |
|                                  | Caffeic acid                             | 0.018    | 0.003 | 0.038    | 0.005 | 0.038    | 0.006 | 0.032    | 0.006 |
|                                  | <i>p</i> -Coumaric acid                  | 0.157    | 0.023 | 0.209    | 0.025 | 0.210    | 0.035 | 0.234    | 0.053 |
|                                  | Ferulic acid                             | 0.217    | 0.014 | 1.210    | 0.152 | 0.480    | 0.092 | 0.538    | 0.089 |
|                                  | Sinapic acid                             | 0.195    | 0.013 | 0.478    | 0.053 | 0.054    | 0.012 | 0.571    | 0.133 |
| Hydroxycinnamic acid derivatives | Coniferaldehyde                          | 0.029    | 0.005 | 0.080    | 0.004 | 0.033    | 0.004 | 0.016    | 0.002 |

Supplementary table 1B – Average values of phenolic compounds (pmol/mg DW) detected in the seed coats of non-dormant RILs.

| Class                            | Compound                                 | CRIL2-50 |       | CRIL2-51 |       | CRIL2-65  |       | CRIL2-80  |       |
|----------------------------------|------------------------------------------|----------|-------|----------|-------|-----------|-------|-----------|-------|
|                                  |                                          | Mean     | SD    | Mean     | SD    | Mean      | SD    | Mean      | SD    |
| Hydroxybenzoate                  | Gallic acid                              | 1.311    | 0.375 | 3.482    | 0.384 | 5.834     | 0.296 | 1.836     | 0.273 |
|                                  | Salicylic acid-2-O- $\beta$ -D-glucoside | 8.148    | 1.557 | 1.277    | 0.169 | 1.106     | 0.260 | 2.858     | 0.351 |
|                                  | 4-Hydroxybenzoic acid                    | 6.311    | 0.796 | 3.714    | 0.407 | 8.678     | 1.286 | 10.778    | 1.939 |
|                                  | Vanillic acid                            | 0.476    | 0.103 | –        | –     | 0.878     | 0.248 | –         | –     |
|                                  | 3-Hydroxybenzoic acid                    | 0.122    | 0.011 | 0.101    | 0.039 | 0.124     | 0.009 | 0.224     | 0.030 |
|                                  | Syringic acid                            | 0.019    | 0.003 | 0.034    | 0.004 | 0.053     | 0.013 | 0.066     | 0.010 |
|                                  | Salicylic acid                           | 2.566    | 0.391 | 1.128    | 0.093 | 0.766     | 0.018 | 2.960     | 0.824 |
| Hydroxycinnamate                 | Chlorogenic acid                         | 0.128    | 0.020 | 0.191    | 0.030 | 0.234     | 0.060 | 0.633     | 0.104 |
|                                  | Caffeic acid                             | 0.036    | 0.006 | 0.014    | 0.001 | 0.066     | 0.006 | 0.031     | 0.004 |
|                                  | <i>p</i> -Coumaric acid                  | 0.157    | 0.048 | 0.172    | 0.004 | 0.250     | 0.067 | 0.248     | 0.044 |
|                                  | Ferulic acid                             | 0.452    | 0.035 | 0.396    | 0.023 | 0.865     | 0.253 | 0.588     | 0.118 |
|                                  | Sinapic acid                             | 0.272    | 0.086 | 0.240    | 0.018 | 0.194     | 0.050 | 0.146     | 0.029 |
| Hydroxycinnamic acid derivatives | Coniferaldehyde                          | 0.019    | 0.005 | 0.060    | 0.005 | 0.045     | 0.012 | 0.024     | 0.004 |
|                                  |                                          | CRIL2-81 |       | CRIL2-89 |       | CRIL2-110 |       | CRIL2-111 |       |
|                                  |                                          | Mean     | SD    | Mean     | SD    | Mean      | SD    | Mean      | SD    |
| Hydroxybenzoate                  | Gallic acid                              | 1.327    | 0.341 | 1.190    | 0.085 | 1.578     | 0.502 | 5.517     | 0.378 |
|                                  | Salicylic acid-2-O- $\beta$ -D-glucoside | 2.906    | 0.298 | 3.643    | 0.091 | 1.395     | 0.257 | 0.917     | 0.138 |
|                                  | 4-Hydroxybenzoic acid                    | 8.452    | 0.630 | 7.759    | 1.089 | 8.076     | 1.797 | 2.934     | 0.697 |
|                                  | Vanillic acid                            | 0.828    | 0.123 | 0.642    | 0.135 | 0.644     | 0.047 | –         | –     |
|                                  | 3-Hydroxybenzoic acid                    | 0.092    | 0.038 | 0.082    | 0.028 | 0.097     | 0.010 | –         | –     |
|                                  | Syringic acid                            | 0.058    | 0.015 | 0.019    | 0.002 | 0.060     | 0.009 | 0.072     | 0.010 |
|                                  | Salicylic acid                           | 0.642    | 0.110 | 1.110    | 0.193 | 0.624     | 0.081 | 0.336     | 0.067 |
| Hydroxycinnamate                 | Chlorogenic acid                         | 0.505    | 0.120 | 0.395    | 0.081 | 0.377     | 0.083 | 0.360     | 0.041 |
|                                  | Caffeic acid                             | 0.055    | 0.017 | 0.038    | 0.010 | 0.031     | 0.003 | 0.027     | 0.002 |
|                                  | <i>p</i> -Coumaric acid                  | 0.204    | 0.013 | 0.182    | 0.021 | 0.195     | 0.015 | 0.106     | 0.009 |
|                                  | Ferulic acid                             | 1.499    | 0.164 | 0.485    | 0.036 | 0.933     | 0.103 | 0.349     | 0.014 |
|                                  | Sinapic acid                             | 0.513    | 0.047 | 0.398    | 0.029 | 0.567     | 0.201 | 1.551     | 0.256 |
| Hydroxycinnamic acid derivatives | Coniferaldehyde                          | 0.015    | 0.004 | 0.015    | 0.003 | 0.032     | 0.001 | 0.028     | 0.001 |
