# Supplementary material for: Phenylpropanoid Content of Chickpea Seed Coats in Relation to Seed Dormancy
Source: MDPI journal article supplement (doi:10.3390/plants12142687), 2023-07-19
Supplement: s1 [file s1]

Supplementary table 4A – Average values of flavonoids (pmol/mg DW) detected in the seed coats of dormant RILs and intermediate CRIL2-25.

| Class    | Compound      | CRIL2-14 |       | CRIL2-21 |       | CRIL2-27 |       | CRIL2-42  |       |
|----------|---------------|----------|-------|----------|-------|----------|-------|-----------|-------|
|          |               | Mean     | SD    | Mean     | SD    | Mean     | SD    | Mean      | SD    |
| Flavanol | Gallocatechin | 11.506   | 0.313 | 5.621    | 1.072 | 7.194    | 1.025 | 14.633    | 0.894 |
|          | Catechin      | –        | –     | 1.587    | 0.397 | –        | –     | –         | –     |
| Flavonol | Myricetin     | 7.033    | 0.055 | 2.251    | 0.614 | 7.911    | 2.017 | 7.160     | 1.857 |
|          | Quercetin     | 0.074    | 0.006 | 0.331    | 0.016 | 0.048    | 0.014 | 0.038     | 0.009 |
|          | Kaempferol    | 0.027    | 0.003 | 0.531    | 0.075 | 0.035    | 0.001 | 0.016     | 0.003 |
|          | Morin         | 2.497    | 0.058 | 6.534    | 1.876 | 2.063    | 0.518 | 1.668     | 0.282 |
|          | Myricitrin    | 0.521    | 0.040 | 0.393    | 0.118 | 0.716    | 0.216 | 1.633     | 0.126 |
|          | Quercitrin    | 0.877    | 0.143 | 1.868    | 0.494 | 0.635    | 0.207 | 2.035     | 0.078 |
|          | Luteolin      | 0.752    | 0.018 | 1.541    | 0.221 | 0.515    | 0.020 | 0.436     | 0.085 |
| Flavone  | Isoorientin   | 0.073    | 0.009 | 0.022    | 0.005 | 0.018    | 0.001 | 0.008     | 0.000 |
|          | Orientin      | 0.151    | 0.020 | 0.061    | 0.013 | 0.045    | 0.001 | 0.034     | 0.004 |
|          | Isovitexin    | 0.008    | 0.002 | 0.002    | 0.001 | 0.003    | 0.001 | 0.002     | 0.000 |
|          | Naringenin    | 3.368    | 0.191 | 3.141    | 0.644 | 3.619    | 0.386 | 1.814     | 0.279 |
|          |               | CRIL2-48 |       | CRIL2-60 |       | CRIL2-79 |       | CRIL2-106 |       |
|          |               | Mean     | SD    | Mean     | SD    | Mean     | SD    | Mean      | SD    |
| Flavanol | Gallocatechin | 16.731   | 2.832 | 14.893   | 1.868 | 12.680   | 0.934 | 12.083    | 1.107 |
|          | Catechin      | 1.137    | 0.292 | 0.452    | 0.038 | –        | –     | –         | –     |
| Flavonol | Myricetin     | 7.459    | 2.711 | 11.566   | 1.566 | 8.212    | 0.423 | 9.894     | 0.743 |
|          | Quercetin     | 0.751    | 0.173 | 0.048    | 0.009 | 0.020    | 0.003 | 0.035     | 0.005 |
|          | Kaempferol    | 0.320    | 0.041 | 0.016    | 0.002 | 0.007    | 0.001 | 0.019     | 0.002 |
|          | Morin         | 11.932   | 2.706 | 2.128    | 0.268 | 0.163    | 0.041 | 1.734     | 0.180 |
|          | Myricitrin    | 1.305    | 0.285 | 1.536    | 0.065 | 1.726    | 0.184 | 1.153     | 0.105 |
|          | Quercitrin    | 3.163    | 1.224 | 1.527    | 0.137 | 1.190    | 0.059 | 1.454     | 0.170 |
|          | Luteolin      | 5.925    | 1.507 | 0.337    | 0.091 | 0.343    | 0.079 | 1.511     | 0.118 |
| Flavone  | Isoorientin   | 0.053    | 0.010 | 0.007    | 0.001 | 0.003    | 0.001 | 0.021     | 0.001 |
|          | Orientin      | 0.053    | 0.015 | 0.048    | 0.004 | 0.023    | 0.003 | 0.054     | 0.006 |
|          | Isovitexin    | 0.005    | 0.001 | 0.003    | 0.000 | 0.002    | 0.001 | 0.006     | 0.000 |
|          | Naringenin    | 4.880    | 0.867 | 2.115    | 0.366 | 1.958    | 0.320 | 2.739     | 0.234 |

Supplementary table 4B – Average values of flavonoids (pmol/mg DW) detected in the seed coats of dormant RILs and intermediate CRIL2-25.

| Class    | Compound      | CRIL2-114 |       | CRIL2-115 |       | CRIL2-129 |       | CRIL2-131 |       |
|----------|---------------|-----------|-------|-----------|-------|-----------|-------|-----------|-------|
|          |               | Mean      | SD    | Mean      | SD    | Mean      | SD    | Mean      | SD    |
| Flavanol | Gallocatechin | 8.995     | 0.844 | 7.442     | 1.885 | 12.640    | 0.831 | 17.576    | 0.225 |
|          | Catechin      | –         | –     | –         | –     | 0.558     | 0.125 | 0.518     | 0.051 |
| Flavonol | Myricetin     | 10.519    | 1.303 | 4.367     | 0.169 | 15.143    | 2.349 | 9.365     | 0.305 |
|          | Quercetin     | 0.040     | 0.014 | 0.035     | 0.005 | 0.082     | 0.014 | 0.040     | 0.003 |
|          | Kaempferol    | 0.026     | 0.005 | 0.014     | 0.002 | 0.024     | 0.003 | 0.019     | 0.002 |
|          | Morin         | 0.134     | 0.028 | 0.114     | 0.026 | 3.329     | 0.218 | 0.210     | 0.012 |
|          | Myricitrin    | 0.424     | 0.050 | 0.531     | 0.152 | 3.049     | 0.129 | 1.472     | 0.021 |
|          | Quercitrin    | 0.705     | 0.094 | 0.651     | 0.228 | 2.958     | 0.196 | 0.900     | 0.082 |
|          | Luteolin      | 0.441     | 0.106 | 0.627     | 0.003 | 0.495     | 0.031 | 0.571     | 0.051 |
| Flavone  | Isoorientin   | 0.036     | 0.010 | 0.010     | 0.000 | 0.009     | 0.002 | 0.009     | 0.001 |
|          | Orientin      | –         | –     | 0.030     | 0.004 | 0.026     | 0.008 | 0.017     | 0.001 |
|          | Isovitexin    | 0.005     | 0.001 | 0.002     | 0.000 | 0.004     | 0.001 | 0.004     | 0.001 |
|          | Naringenin    | 2.652     | 0.510 | 2.936     | 0.703 | 3.699     | 0.628 | 3.534     | 0.297 |
|          |               | CRIL2-25  |       |           |       |           |       |           |       |
|          |               | Mean      | SD    |           |       |           |       |           |       |
| Flavanol | Gallocatechin | 9.642     | 0.929 |           |       |           |       |           |       |
|          | Catechin      | –         | –     |           |       |           |       |           |       |
| Flavonol | Myricetin     | 10.735    | 0.919 |           |       |           |       |           |       |
|          | Quercetin     | 0.094     | 0.013 |           |       |           |       |           |       |
|          | Kaempferol    | 0.043     | 0.001 |           |       |           |       |           |       |
|          | Morin         | 2.954     | 0.445 |           |       |           |       |           |       |
|          | Myricitrin    | 0.834     | 0.093 |           |       |           |       |           |       |
|          | Quercitrin    | 0.825     | 0.055 |           |       |           |       |           |       |
|          | Luteolin      | 0.831     | 0.109 |           |       |           |       |           |       |
| Flavone  | Isoorientin   | 0.052     | 0.006 |           |       |           |       |           |       |
|          | Orientin      | 0.114     | 0.016 |           |       |           |       |           |       |
|          | Isovitexin    | 0.006     | 0.002 |           |       |           |       |           |       |
|          | Naringenin    | 3.467     | 0.765 |           |       |           |       |           |       |
